# Supplementary material
Source: HighWire-hosted journal article supplement (http://www.jrheum.org/highwire/filestream/31880/field_highwire_adjunct_files/0/161369DataSuppl.pdf)
Supplement: 161369DataSuppl.pdf [file 161369DataSuppl.pdf]

## ONLINE SUPPLEMENTARY DATA

*Supplementary Table 1.* Genotyping platforms used in each of the six cohorts analyzed.

|                           | CASES      |              | CONTROLS      |              |
|---------------------------|------------|--------------|---------------|--------------|
|                           | ImmunoChip | TaqMan®      | ImmunoChip    | TaqMan®      |
| <b>Spain</b>              | 309        | 1,184        | 1,517         | 1,625        |
| <b>Germany</b>            | ND         | 710          | ND            | 376          |
| <b>The Netherlands</b>    | ND         | 364          | 1,173         | 601          |
| <b>Italy</b>              | 256        | 460          | 1,270         | 773          |
| <b>The United Kingdom</b> | 258        | 752          | 8,610         | 372          |
| <b>Norway</b>             | ND         | 99           | ND            | 274          |
| <b>TOTAL (N)</b>          | <b>823</b> | <b>3,569</b> | <b>12,570</b> | <b>4,021</b> |

Cases, data from samples of systemic sclerosis patients; Controls, data from samples of unaffected controls; ND, No data.

**Supplementary Table 2.** Results of the statistical analyses of systemic sclerosis patients, systemic sclerosis phenotypic and serological subgroups, and unaffected controls for *MIF* rs755622 polymorphism in six European cohorts separately.

| Population         | Subgroup (N)       | MAF (%) | <i>P</i> -value* | SE      | OR [CI 95%]**    |
|--------------------|--------------------|---------|------------------|---------|------------------|
| Spain              | Controls (n=3,142) | 14.50   |                  |         |                  |
|                    | SSc (n=1494)       | 16.06   | 4.83E-2          | 0.06137 | 1.13 [1.00-1.27] |
|                    | lcSSc (n=1048)     | 15.22   | 0.42             | 0.07058 | 1.06 [0.92-1.22] |
|                    | dcSSc (n=445)      | 17.87   | 8.30E-3          | 0.09456 | 1.28 [1.07-1.54] |
|                    | ACA+ (n=703)       | 14.58   | 0.94             | 0.08363 | 1.01 [0.85-1.19] |
|                    | ATA+ (n=333)       | 17.72   | 2.61E-2          | 0.1076  | 1.27 [1.03-1.57] |
|                    | PF+ (n=322)        | 18.48   | 6.84E-3          | 0.1077  | 1.34 [1.08-1.65] |
|                    | PAH+ (n=104)       | 19.71   | 3.65E-2          | 0.1779  | 1.45 [1.02-2.05] |
| Germany            | Controls (n=376)   | 16.22   |                  |         |                  |
|                    | SSc (n=710)        | 17.82   | 0.35             | 0.1208  | 1.12 [0.88-1.42] |
|                    | lcSSc (n=408)      | 16.67   | 0.81             | 0.1364  | 1.03 [0.79-1.35] |
|                    | dcSSc (n=302)      | 19.37   | 0.13             | 0.1428  | 1.24 [0.94-1.64] |
|                    | ACA+ (n=283)       | 18.02   | 0.39             | 0.1475  | 1.14 [0.85-1.52] |
|                    | ATA+ (n=205)       | 17.07   | 0.71             | 0.1643  | 1.06 [0.77-1.47] |
|                    | PF+ (n=215)        | 16.74   | 0.82             | 0.1627  | 1.04 [0.76-1.43] |
|                    | PAH+ (n=33)        | 18.18   | 0.68             | 0.3341  | 1.15 [0.60-2.21] |
| The Netherlands    | Controls (n=1774)  | 18.46   |                  |         |                  |
|                    | SSc (n=364)        | 21.29   | 0.08             | 0.1003  | 1.20 [0.98-1.45] |
|                    | lcSSc (n=251)      | 20.72   | 0.23             | 0.1183  | 1.15 [0.92-1.46] |
|                    | dcSSc (n=113)      | 22.57   | 0.12             | 0.1643  | 1.29 [0.93-1.78] |
|                    | ACA+ (n=89)        | 21.91   | 0.25             | 0.1863  | 1.24 [0.86-1.79] |
|                    | ATA+ (n=97)        | 22.16   | 0.20             | 0.1782  | 1.26 [0.89-1.78] |
|                    | PF+ (n=134)        | 19.03   | 0.82             | 0.1615  | 1.04 [0.76-1.43] |
|                    | PAH+ (n=15)        | 23.33   | 0.49             | 0.4338  | 1.34 [0.57-3.14] |
| Italy              | Controls (n=2043)  | 13.26   |                  |         |                  |
|                    | SSc (n=716)        | 13.41   | 0.89             | 0.09023 | 1.01 [0.85-1.21] |
|                    | lcSSc (n=534)      | 13.48   | 0.85             | 0.1008  | 1.02 [0.84-1.24] |
|                    | dcSSc (n=182)      | 13.19   | 0.97             | 0.1616  | 0.99 [0.72-1.36] |
|                    | ACA+ (n=297)       | 12.46   | 0.59             | 0.1325  | 0.93 [0.72-1.21] |
|                    | ATA+ (n=252)       | 13.89   | 0.70             | 0.1368  | 1.06 [0.81-1.38] |
|                    | PF+ (n=259)        | 11.20   | 0.19             | 0.1468  | 0.82 [0.62-1.10] |
|                    | PAH+ (n=29)        | 15.52   | 0.62             | 0.3656  | 1.20 [0.59-2.46] |
| The United Kingdom | Controls (n=8982)  | 16.53   |                  |         |                  |
|                    | SSc (n=1010)       | 15.45   | 0.21             | 0.06476 | 0.92 [0.81-1.05] |
|                    | lcSSc (n=750)      | 15.80   | 0.46             | 0.07358 | 0.95 [0.82-1.09] |
|                    | dcSSc (n=260)      | 14.42   | 0.20             | 0.1264  | 0.85 [0.66-1.09] |
|                    | ACA+ (n=388)       | 17.01   | 0.73             | 0.09763 | 1.04 [0.85-1.25] |
|                    | ATA+ (n=179)       | 15.08   | 0.47             | 0.149   | 0.90 [0.67-1.20] |
|                    | PF+ (n=309)        | 16.18   | 0.82             | 0.111   | 0.97 [0.78-1.21] |
|                    | PAH+ (n=40)        | 18.75   | 0.59             | 0.2871  | 1.17 [0.66-2.05] |
| Norway             | Controls (n=274)   | 15.88   |                  |         |                  |
|                    | SSc (n=99)         | 21.21   | 0.09             | 0.2095  | 1.43 [0.95-2.15] |
|                    | lcSSc (n=68)       | 23.53   | 3.51E-2          | 0.2335  | 1.63 [1.03-2.58] |
|                    | dcSSc (n=31)       | 16.13   | 0.96             | 0.3645  | 1.02 [0.50-2.08] |
|                    | ACA+ (n=54)        | 24.07   | 3.92E-2          | 0.2536  | 1.68 [1.02-2.76] |
|                    | ATA+ (n=13)        | 19.23   | 0.65             | 0.5112  | 1.26 [0.46-3.44] |
|                    | PF+ (n=35)         | 20.00   | 0.38             | 0.3209  | 1.33 [0.71-2.48] |
|                    | PAH+ (n=9)         | 22.22   | 0.47             | 0.5789  | 1.51 [0.49-4.71] |

Online supplement to: An MIF Promoter Polymorphism Is Associated with Susceptibility to Pulmonary Arterial Hypertension in Diffuse Cutaneous Systemic Sclerosis. *The Journal of Rheumatology*. doi:10.3899/jrheum.161369

\*Unaffected controls are used as reference for the global set of the disease and for each phenotype comparison. \*\*Odds ratio (OR) for the minor allele. MAF, minor allele frequency; CI, confidence interval; SSc, systemic sclerosis; lcSSc, limited cutaneous systemic sclerosis; dcSSc, diffuse cutaneous systemic sclerosis; ACA+, patients with anti-centromere antibodies; ATA+, patients with anti-topoisomerase antibodies; PF+, patients affected by pulmonary fibrosis; PAH+, patients affected by pulmonary arterial hypertension.

**Supplementary Table 3.** Results of the statistical analyses of four subgroups of patients based on systemic sclerosis-subtype and pulmonary arterial hypertension status and unaffected controls for *MIF* rs755622 in six European cohorts separately.

| Population         | Subgroup (N)              | MAF (%) | P-value* | SE      | OR [CI 95%]**      |
|--------------------|---------------------------|---------|----------|---------|--------------------|
| Spain              | Controls (n=3,142)        | 14.50   |          |         |                    |
|                    | dcSSc with PAH (n=18)     | 25.00   | 0.07     | 0.3866  | 1.97 [0.92-4.19]   |
|                    | lcSSc with PAH (n=86)     | 18.60   | 0.13     | 0.1992  | 1.35 [0.91-1.99]   |
|                    | dcSSc without PAH (n=329) | 17.93   | 1.83E-2  | 0.1078  | 1.29 [1.04-1.59]   |
|                    | lcSSc without PAH (n=753) | 14.50   | 0.62     | 0.08056 | 1.04 [0.89-1.22]   |
| Germany            | Controls (n=376)          | 16.22   |          |         |                    |
|                    | dcSSc with PAH (n=10)     | 25.00   | 0.30     | 0.5258  | 1.72 [0.61-4.82]   |
|                    | lcSSc with PAH (n=23)     | 15.22   | 0.86     | 0.4222  | 0.93 [0.41-2.12]   |
|                    | dcSSc without PAH (n=221) | 20.36   | 0.07     | 0.1541  | 1.32 [0.98-1.79]   |
|                    | lcSSc without PAH (n=270) | 17.04   | 0.70     | 0.1513  | 1.06 [0.79-1.43]   |
| The Netherlands    | Controls (n=1,774)        | 18.46   |          |         |                    |
|                    | dcSSc with PAH (n=2)      | 75.00   | 3.63E-3  | 1.156   | 13.25 [1.38-127.6] |
|                    | lcSSc with PAH (n=13)     | 15.38   | 0.69     | 0.5453  | 0.80 [0.23-2.34]   |
|                    | dcSSc without PAH (n=58)  | 19.83   | 0.71     | 0.2369  | 1.09 [0.69-1.74]   |
|                    | lcSSc without PAH (n=173) | 20.23   | 0.42     | 0.1406  | 1.12 [0.85-1.48]   |
| Italy              | Controls (n=2,043)        | 13.26   |          |         |                    |
|                    | dcSSc with PAH (n=2)      | 0       | 0.43     | Inf     | NA                 |
|                    | lcSSc with PAH (n=27)     | 16.67   | 0.46     | 0.368   | 1.31 [0.64-2.69]   |
|                    | dcSSc without PAH (n=149) | 13.09   | 0.93     | 0.1778  | 0.98 [0.69-1.40]   |
|                    | lcSSc without PAH (n=412) | 13.59   | 0.80     | 0.1116  | 1.03 [0.83-1.28]   |
| The United Kingdom | Controls (n=8982)         | 16.53   |          |         |                    |
|                    | dcSSc with PAH (n=2)      | 50.00   | 0.07     | 1       | 5.05 [0.71-35.86]  |
|                    | lcSSc with PAH (n=38)     | 17.11   | 0.89     | 0.3053  | 1.04 [0.57-1.90]   |
|                    | dcSSc without PAH (n=164) | 13.41   | 0.13     | 0.1633  | 0.78 [0.57-1.08]   |
|                    | lcSSc without PAH (n=438) | 15.41   | 0.38     | 0.09571 | 0.92 [0.76-1.11]   |
| Norway             | Controls (n=274)          | 15.88   |          |         |                    |
|                    | dcSSc with PAH (n=0)      | NA      | NA       | NA      | NA                 |
|                    | lcSSc with PAH (n=9)      | 22.22   | 0.47     | 0.5789  | 1.51 [0.49-4.71]   |
|                    | dcSSc without PAH (n=30)  | 16.67   | 0.87     | 0.3656  | 1.06 [0.52-2.17]   |
|                    | lcSSc without PAH (n=57)  | 24.56   | 2.60E-2  | 0.247   | 1.73 [1.06-2.8]    |

\*Unaffected controls are used as reference for each phenotype comparison. \*\*Odds ratio (OR) for the minor allele. MAF, minor allele frequency; CI, confidence interval; SSc, systemic sclerosis; lcSSc, limited cutaneous systemic sclerosis; dcSSc, diffuse cutaneous systemic sclerosis; ACA+, patients with anti-centromere antibodies; ATA+, patients with anti-topoisomerase antibodies; PF+, patients affected by pulmonary fibrosis; PAH+, patients affected by pulmonary arterial hypertension.
